# Supplementary material for: 4-Acetyl-Antroquinonol B Improves the Sensitization of Cetuximab on Both Kras Mutant and Wild Type Colorectal Cancer by Modulating the Expression of Ras/Raf/miR-193a-3p Signaling Axis
Source: MDPI journal article supplement (doi:10.3390/ijms22147508), 2021-07-14
Supplement: s1 [file s1]

## SUPPLEMENTARY INFORMATION

**Supplementary Table S1. Western blot antibodies sheet.**

| No. | Target    | Dilution | Catalog                                                     | kDa      |
|-----|-----------|----------|-------------------------------------------------------------|----------|
| 1   | GAPDH     | 1:1000   | GAPDH (0411K) Mouse mAb SC-27724                            | 37       |
| 2   | RAS       | 1:500    | Ras (D2C1) Rabbit mAb #8955                                 | 21       |
| 3   | KRAS      | 1:500    | Proteintech Anti-KRAS Polyclonal, Catalog # 12063-1-AP      | 21       |
| 4   | p-ERK     | 1:1000   | Phospho-p44/42 MAPK (Erk1/2) (Thr202/Tyr204) Antibody #9101 | 42,44    |
| 5   | p-MEK     | 1:1000   | Phospho-MEK1/2 (Ser217/221) Antibody #9121                  | 45       |
| 6   | c-RAF     | 1:500    | c-Raf Antibody #9422                                        | 65-75    |
| 7   | p-c-RAF   | 1:500    | Phospho-c-Raf (Ser259) Antibody #9421                       | 74       |
| 8   | Caspase 3 | 1:500    | Anti-Caspase 3 antibody (GTX110543) GeneTex                 | 32       |
| 9   | Caspase 9 | 1:500    | Caspase-9 Antibody (Human Specific) #9502                   | 35,37,47 |
| 10  | p-EGFR    | 1:500    | Phospho-EGF Receptor (Tyr1173) (53A5) Rabbit mAb #4407      | 175      |
| 11  | BRAF      | 1:500    | Anti-BRAF antibody (ab85972)                                | 84       |
| 12  | PARP1     | 1:500    | Anti-PARP1 antibody [EPR18461] (ab191217)                   | 113      |

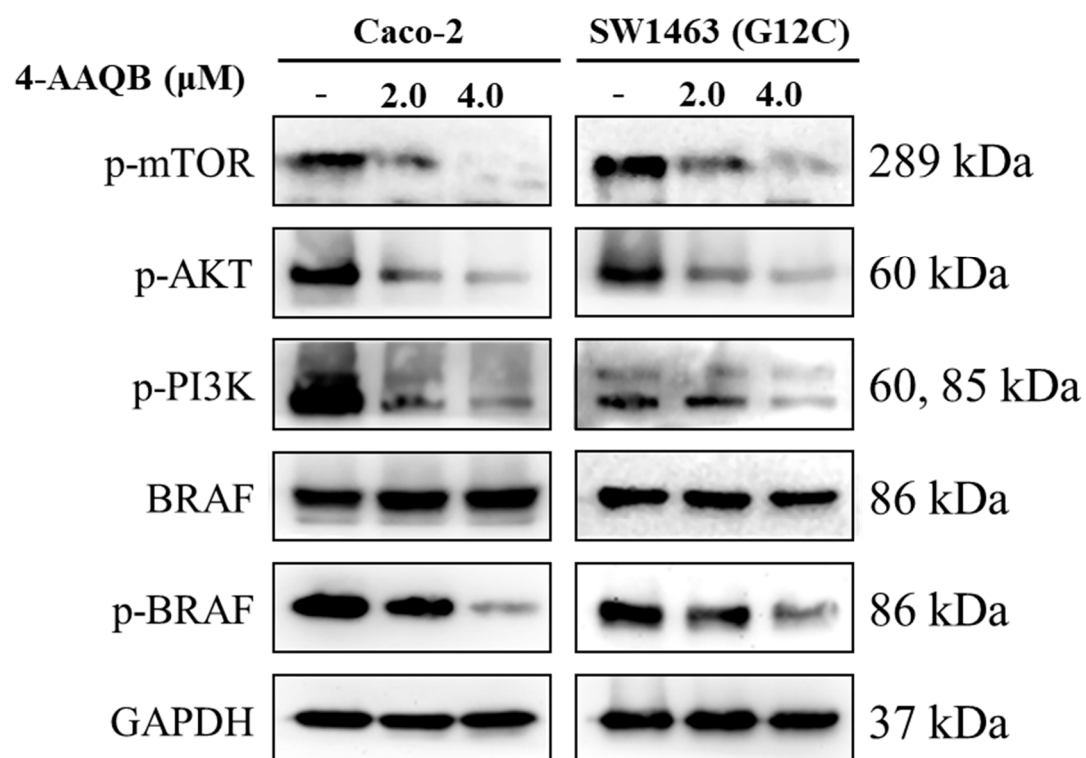

**Supplementary Figure S1.** Reduction in the oncogenic marker expression (p-mTOR, p-AKT, p-PI3K), and B-RAF/p-B-RAF was observed after the 4-AAQB treatment on both the CRC cells (SW1463 and Caco-2).

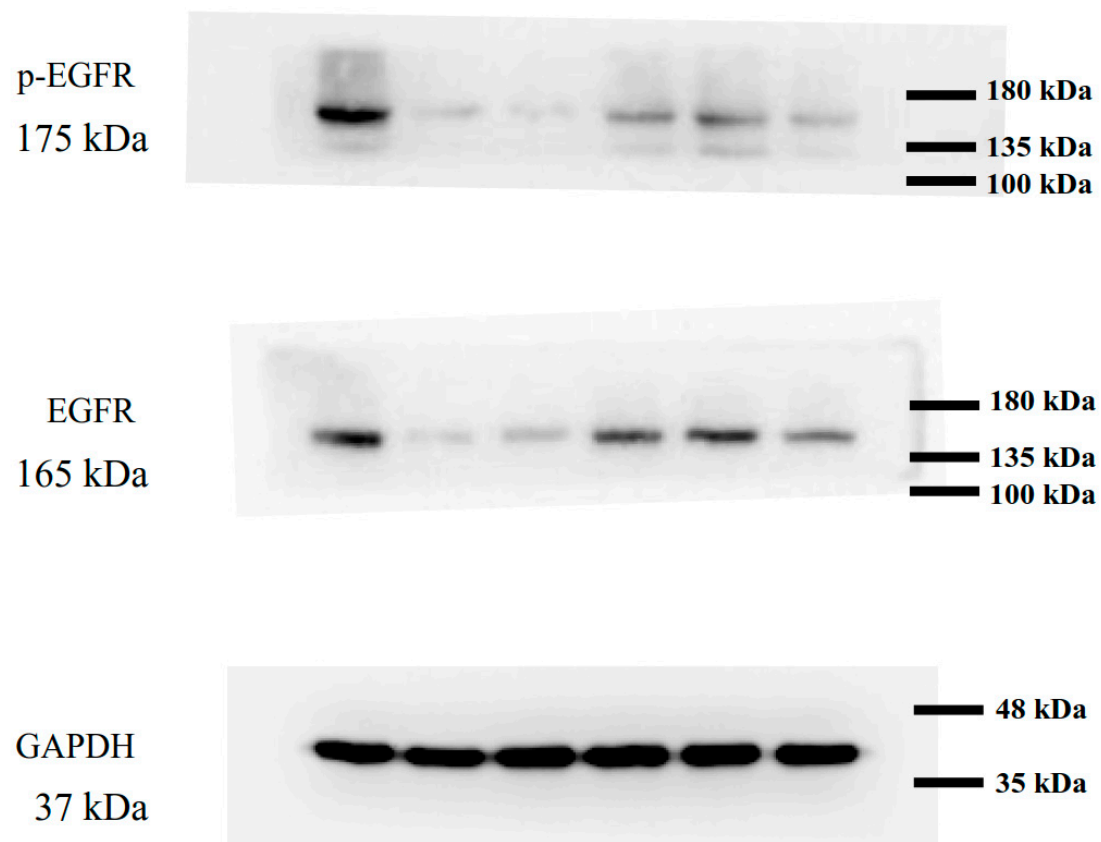

**Supplementary Figure S2.** Full-size blots of Figure 2A

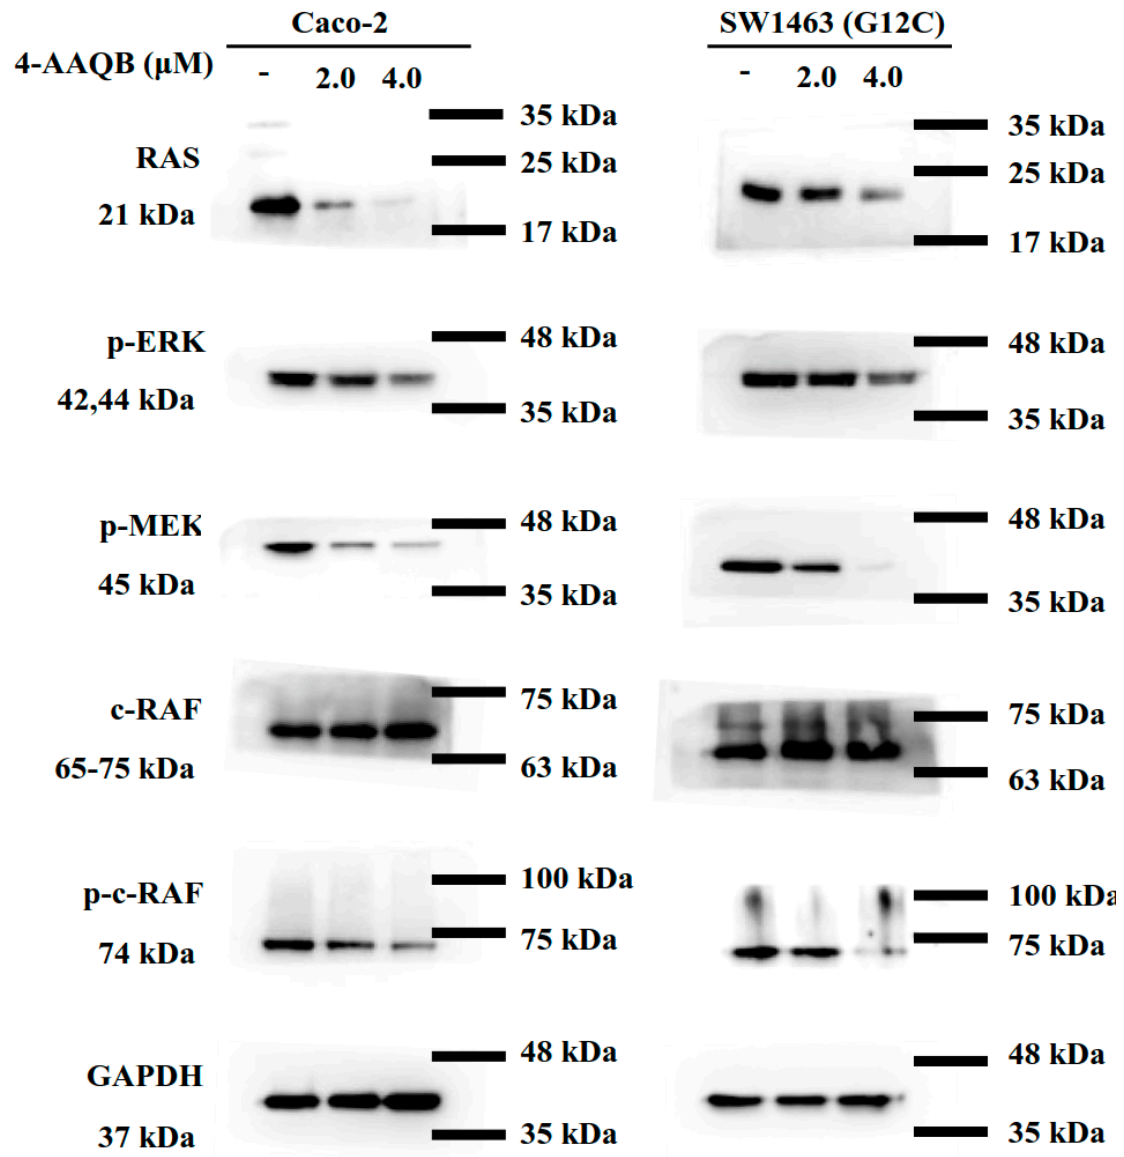

Supplementary Figure S3. Full-size blots of Figure 3H

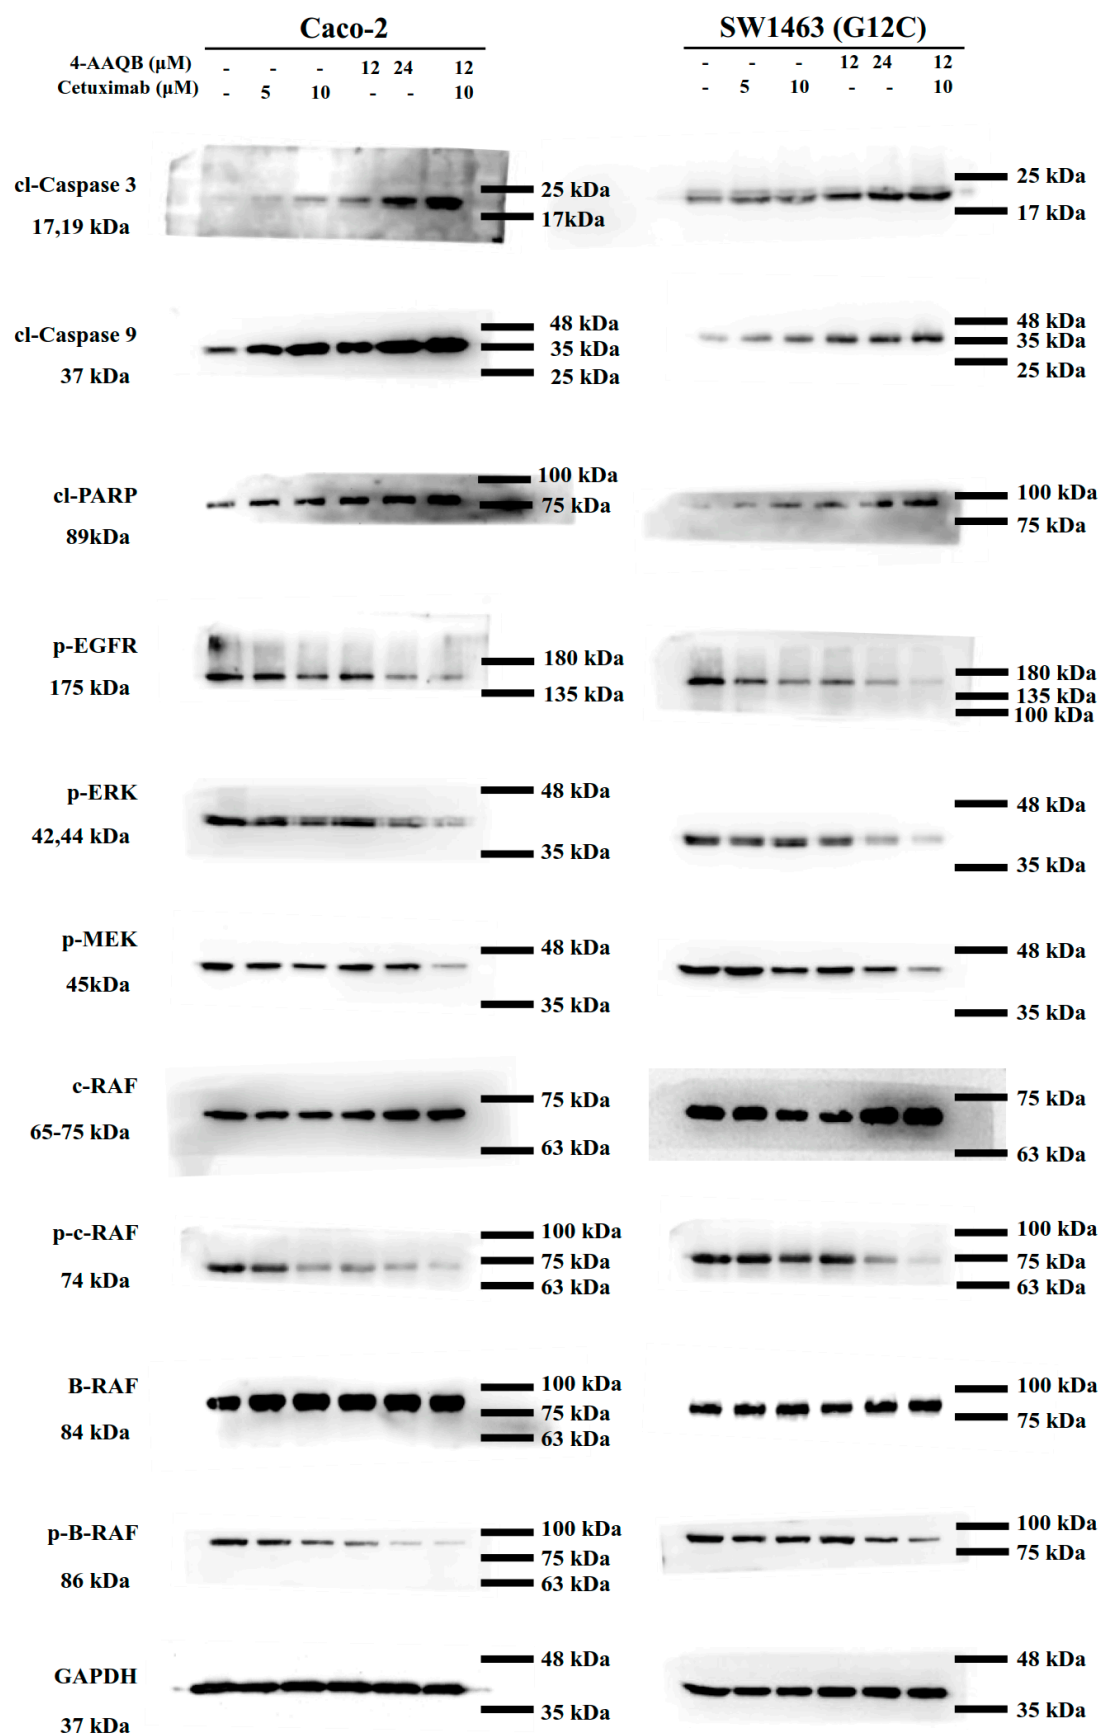

**Supplementary Figure S4.** Full-size blots of Figure 4F

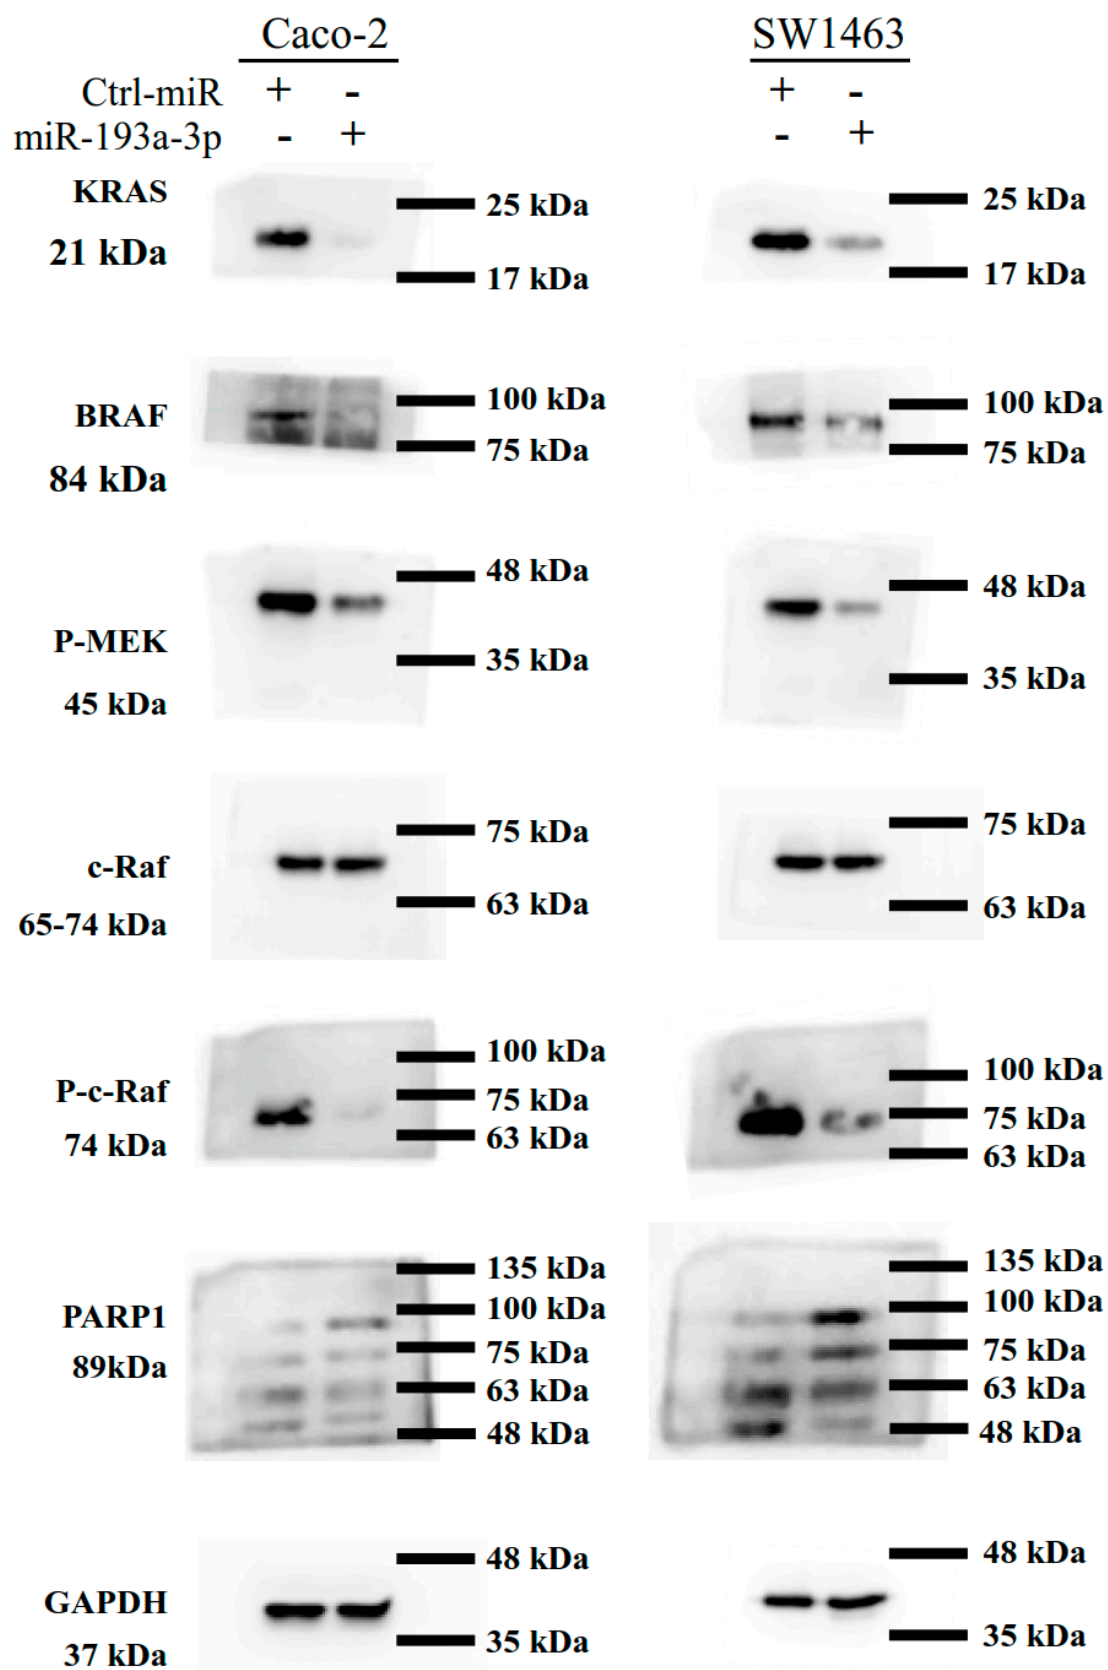

Supplementary Figure S5. Full-size blots of Figure 5H

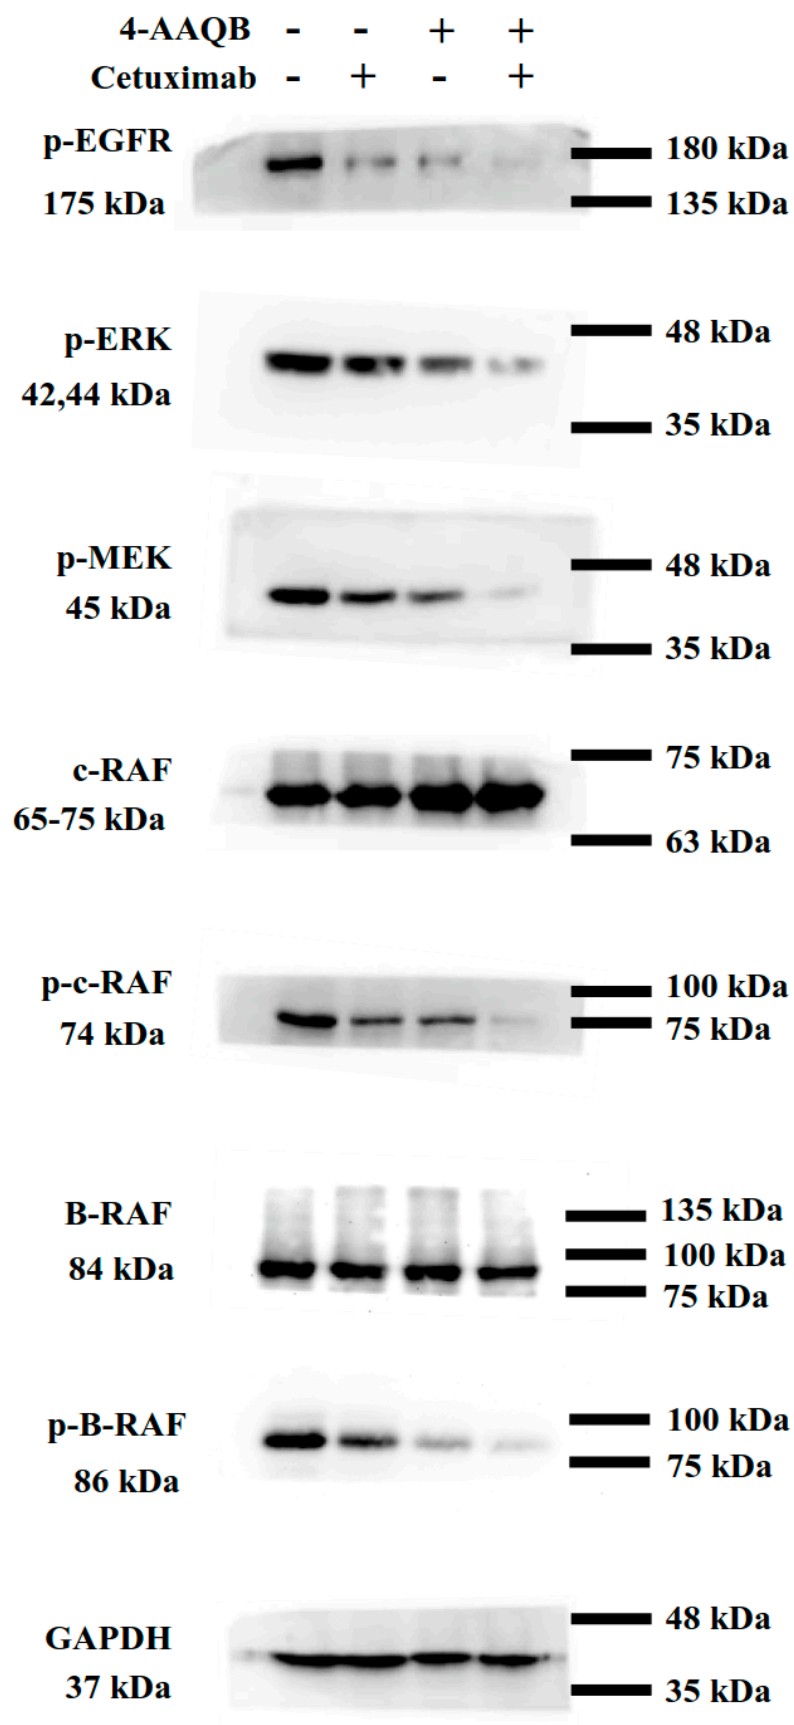

Supplementary Figure S6. Full-size blots of Figure 6C

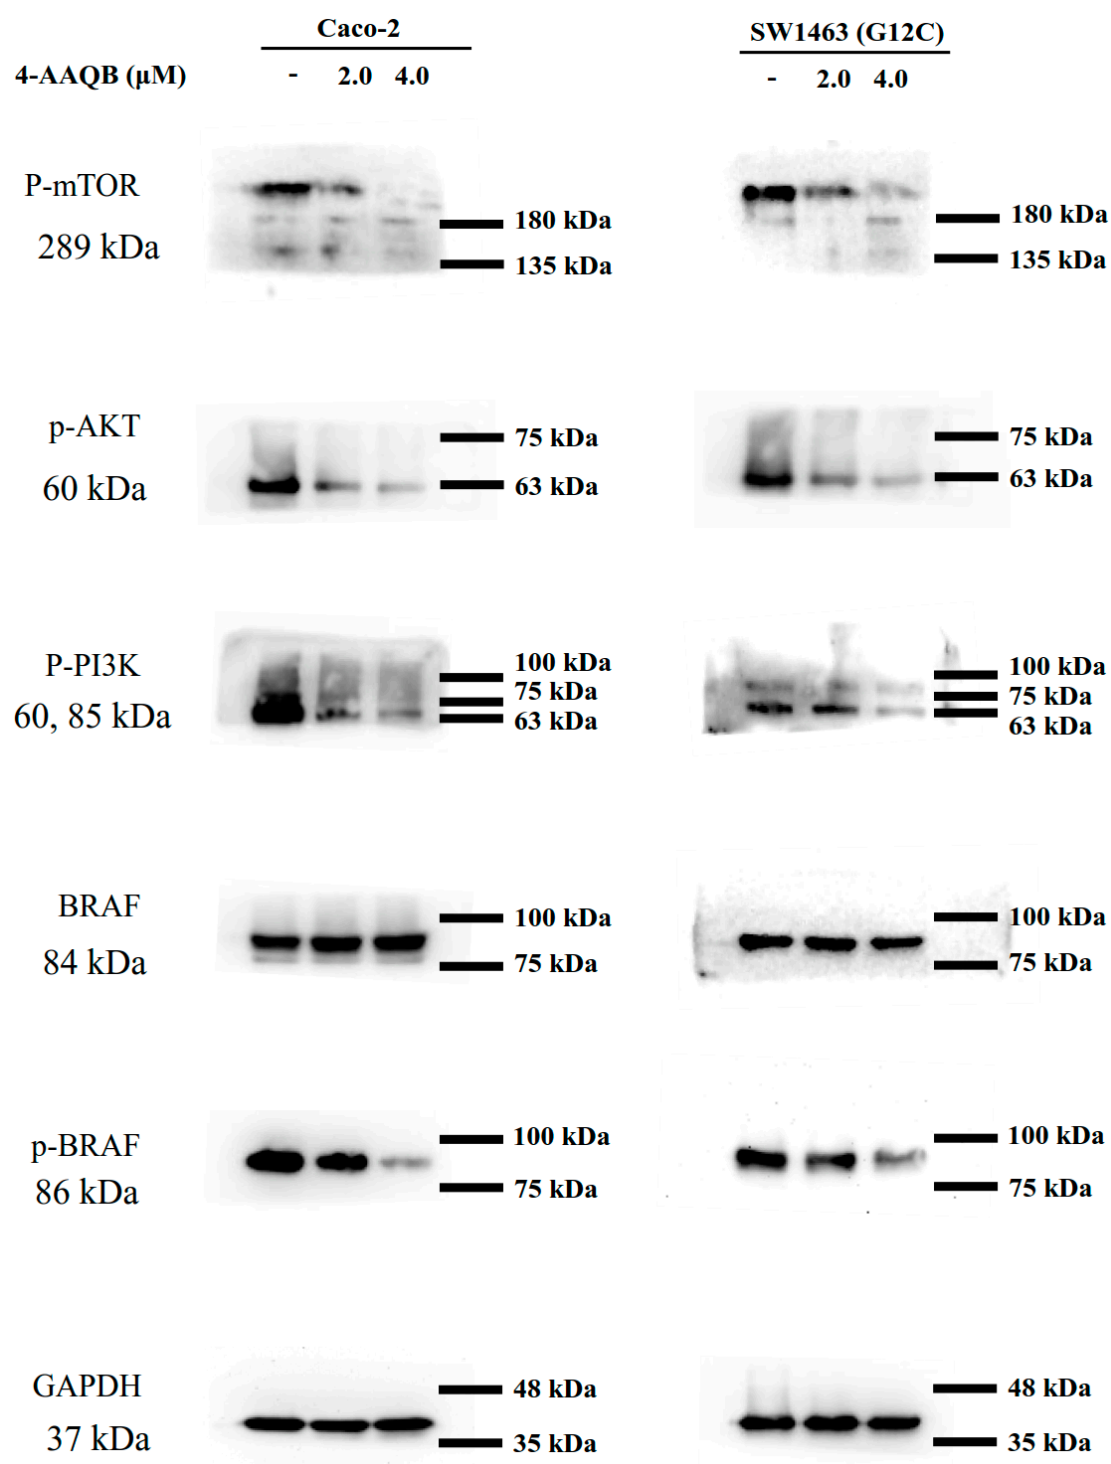

**Supplementary Figure S7.** Full-size blots of Supplementary Figure S1
